# Supplementary material for: An ensemble approach for large-scale identification of protein-protein interactions using the alignments of multiple sequences
Source: PubMed Central journal article supplement (PMC5354898; doi:10.18632/oncotarget.14103), 2016-12-22
Supplement: oncotarget-08-5149-s001.pdf [file oncotarget-08-5149-s001.pdf]

## **An ensemble approach for large-scale identification of protein-protein interactions using the alignments of multiple sequences**

### **SUPPLEMENTARY TABLE**

**Supplementary Table S1: We implemented the proposed method on Yeast data set for potential protein-protein interactions. As a result, 15 out of the top 100 predicted PPIs were confirmed by the databases of DIP, MINT and IntAct**

See Supplementary File 1
